# Supplementary material for: Design, Synthesis and In Vitro Biological Activity of Novel C-7 Methylene Congeners of Furanoallocolchicinoids
Source: Pharmaceutics. 2023 Mar 23;15(4):1034. doi: 10.3390/pharmaceutics15041034 (PMC10143105; doi:10.3390/pharmaceutics15041034)
Supplement: Supplementary file 1 [file pharmaceutics-15-01034-s001.zip › pharmaceutics-2279911-supplementary.pdf]

## Supporting information for

# Design, Synthesis and In Vitro Biological Activity of Novel C-7 Methylene Congeners of Furanoallocalcolchicinoids

Iuliia A. Gracheva <sup>1</sup>, Elena V. Svirshchevskaya <sup>2</sup>, Ekaterina S. Shchegravina <sup>1</sup>, Yulia B. Malysheva <sup>1</sup>,  
Alsu R. Sitdikova <sup>1</sup> and Alexey Yu. Fedorov <sup>1,\*</sup>

<sup>1</sup> Department of Organic Chemistry, Nizhny Novgorod State University, Gagarina Av. 23, Nizhny Novgorod 603950, Russia

<sup>2</sup> Department of Immunology, Shemyakin-Ovchinnikov Institute of Bioorganic Chemistry RAS, Miklukho-Maklaya 16/10, Moscow 117997, Russia

### <sup>1</sup>H and <sup>13</sup>C NMR spectra of compounds 14, 15a-c, 8a-c, 9Z, 9E

#### Compound 14

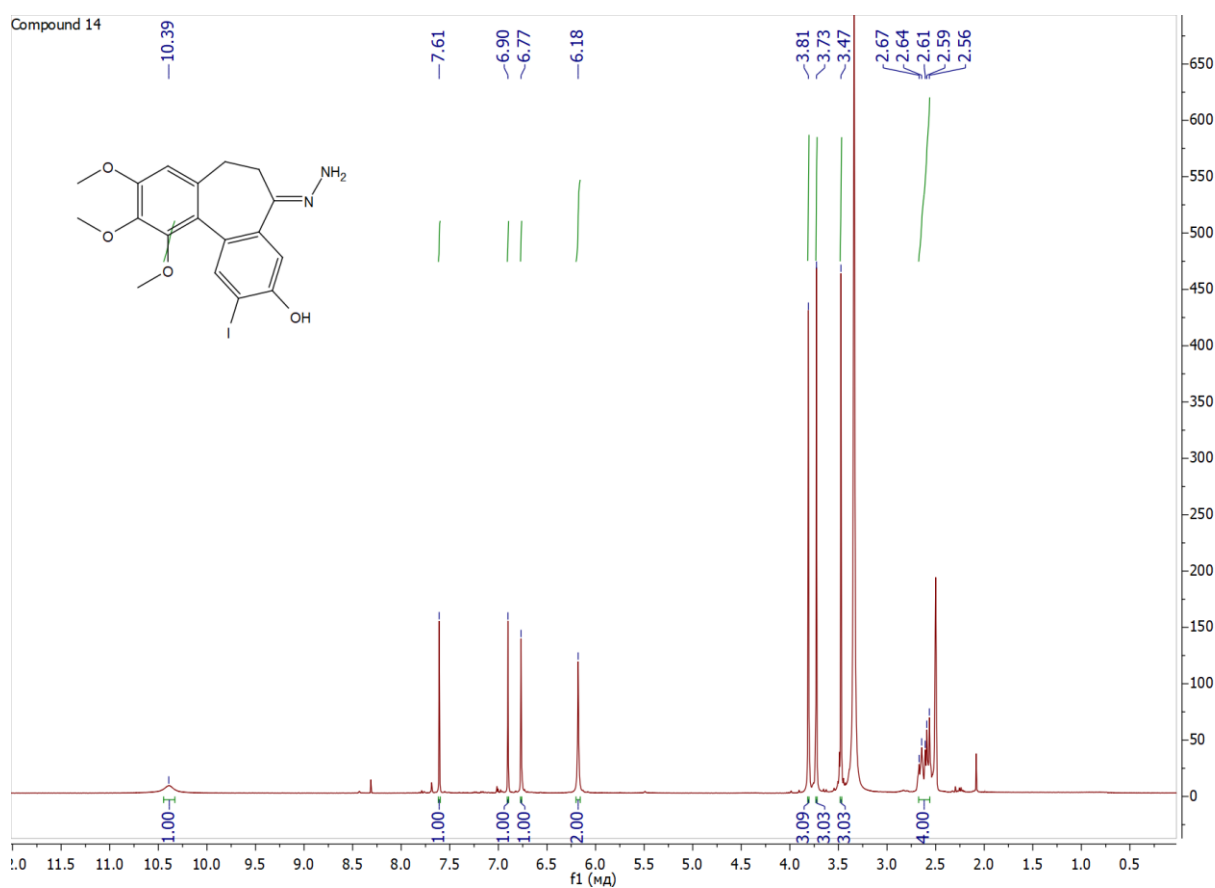

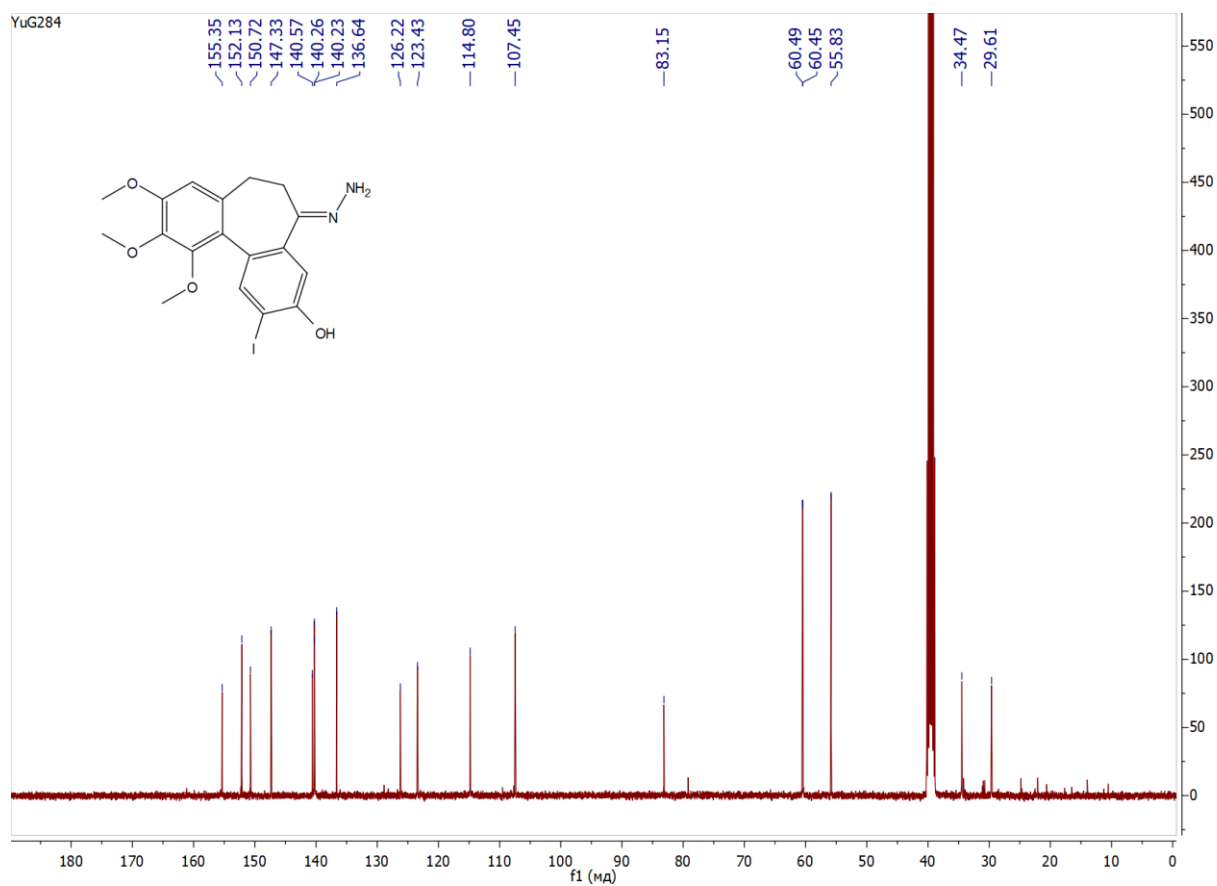

Compound 15a

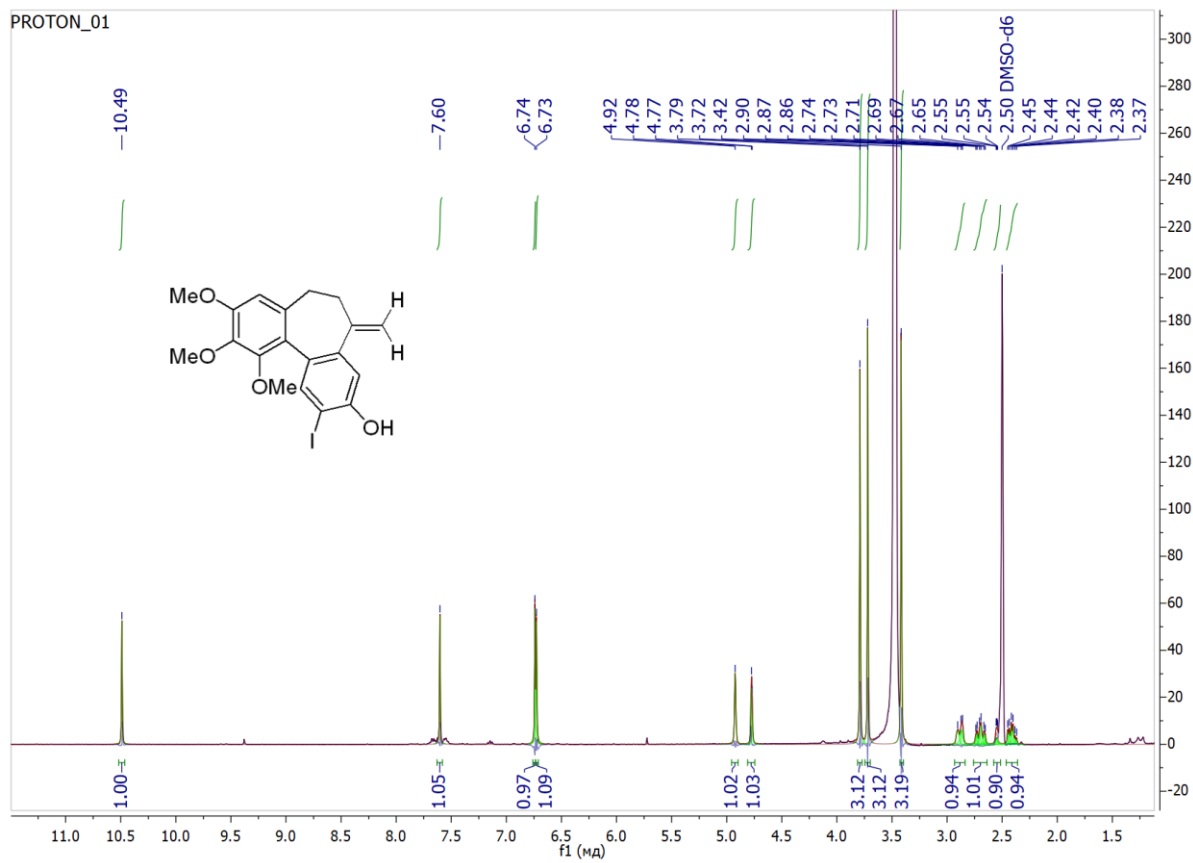

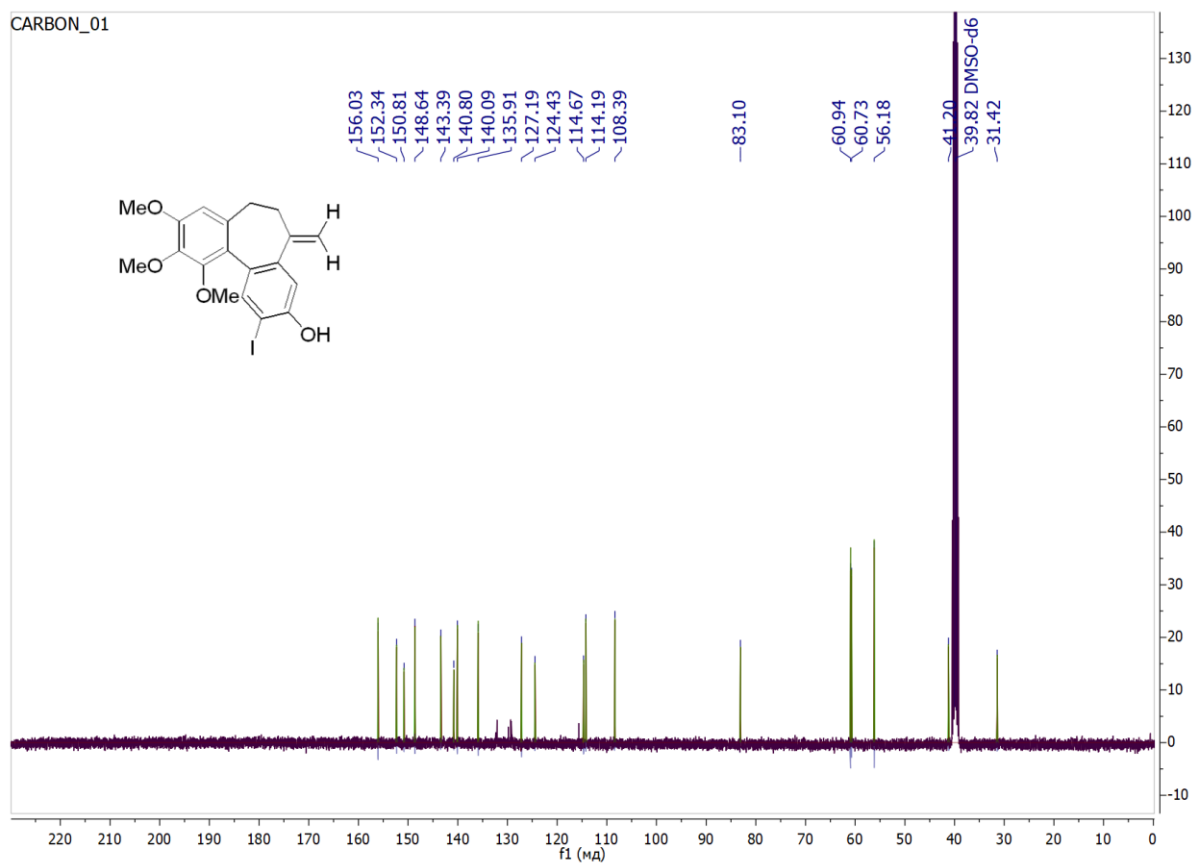

Compound 15b

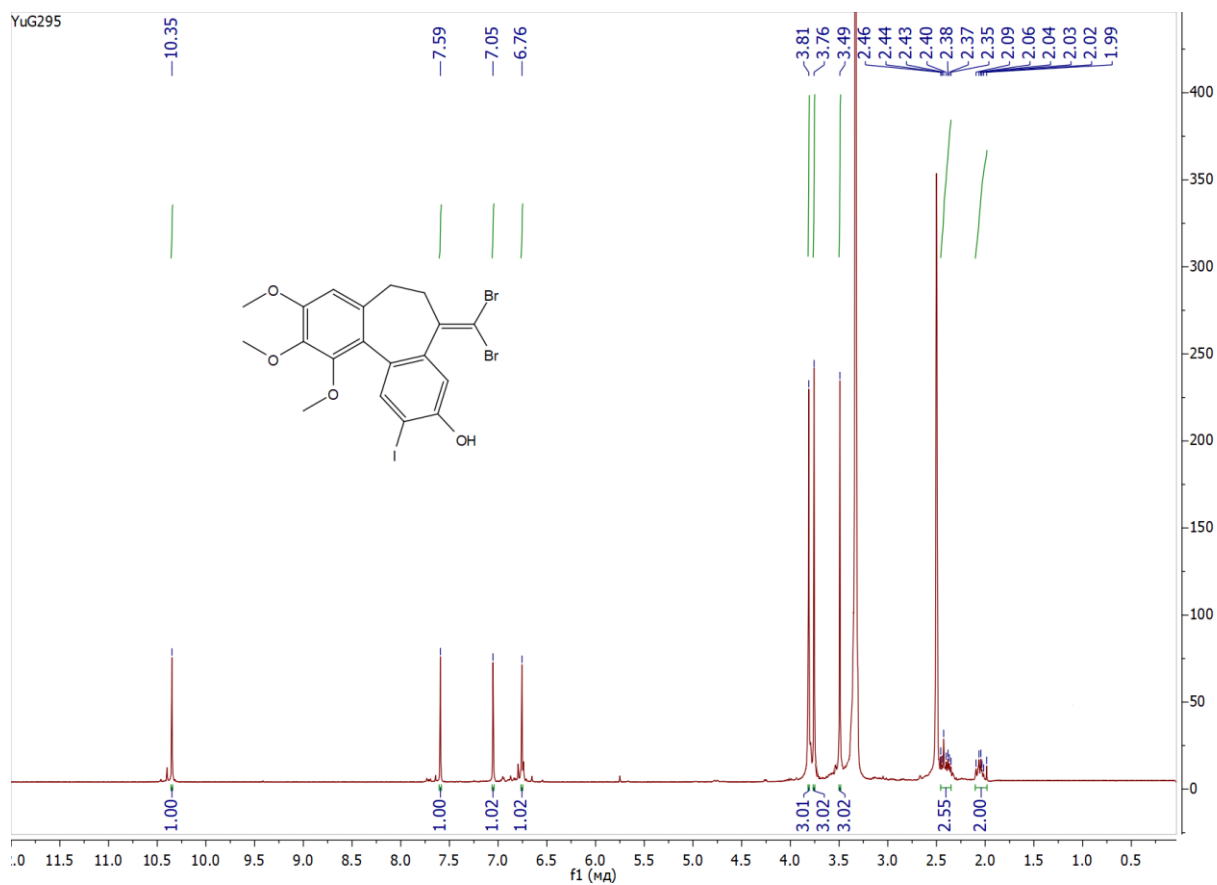

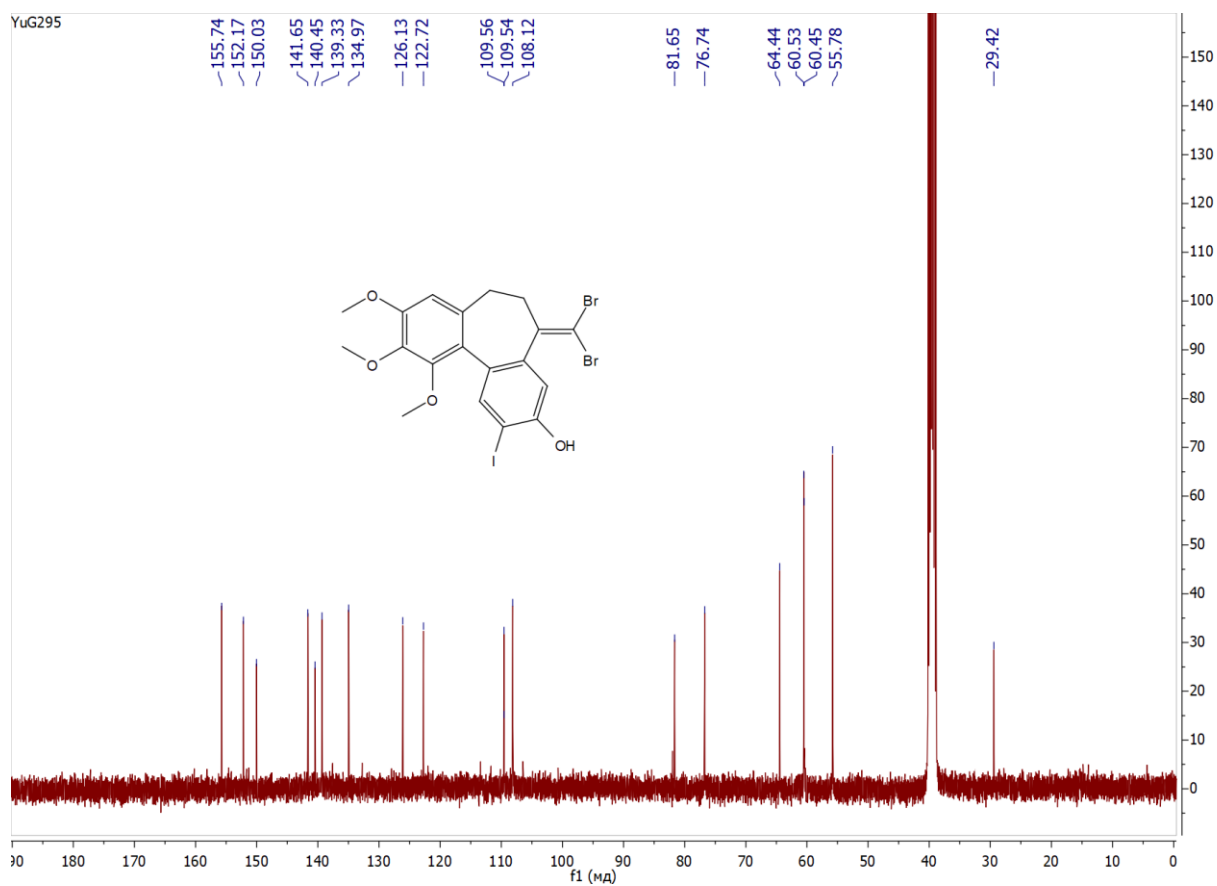

## Compound 15c

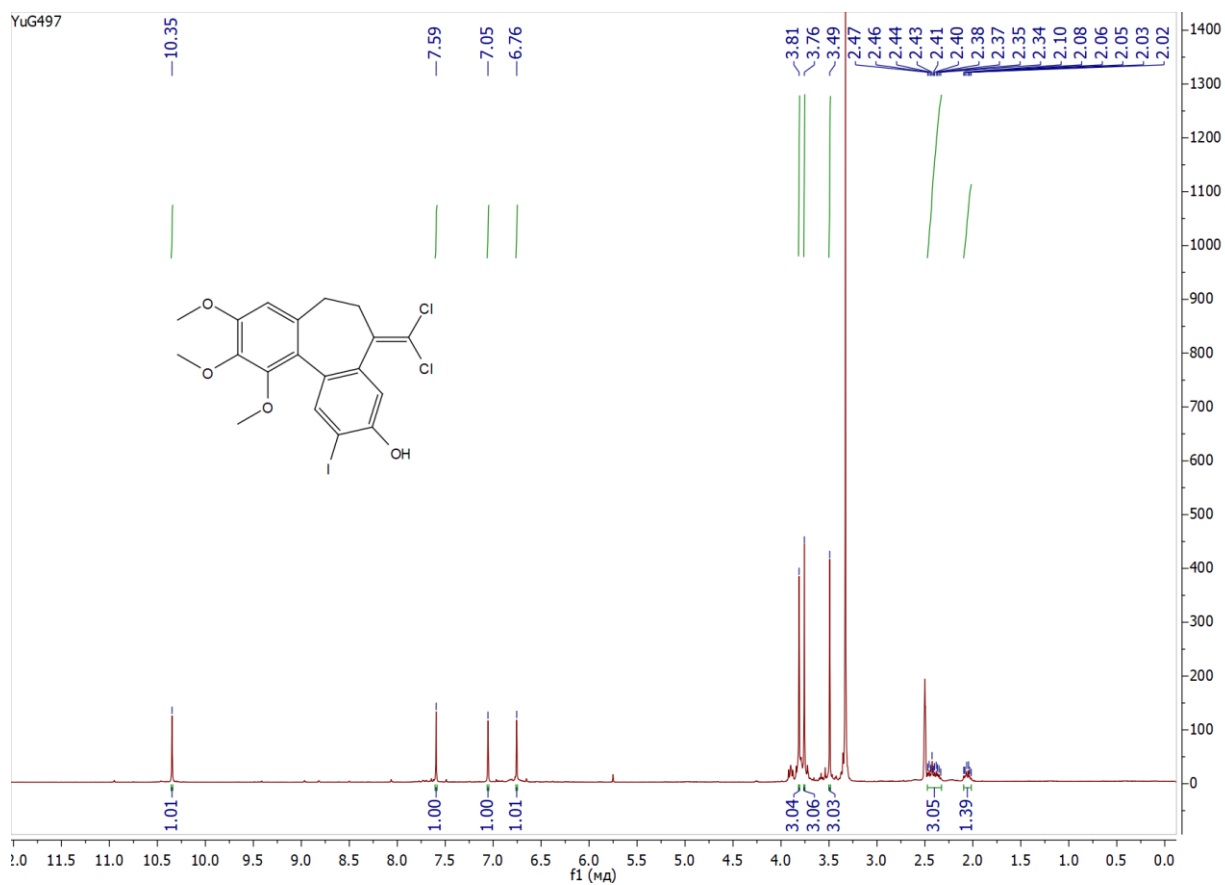

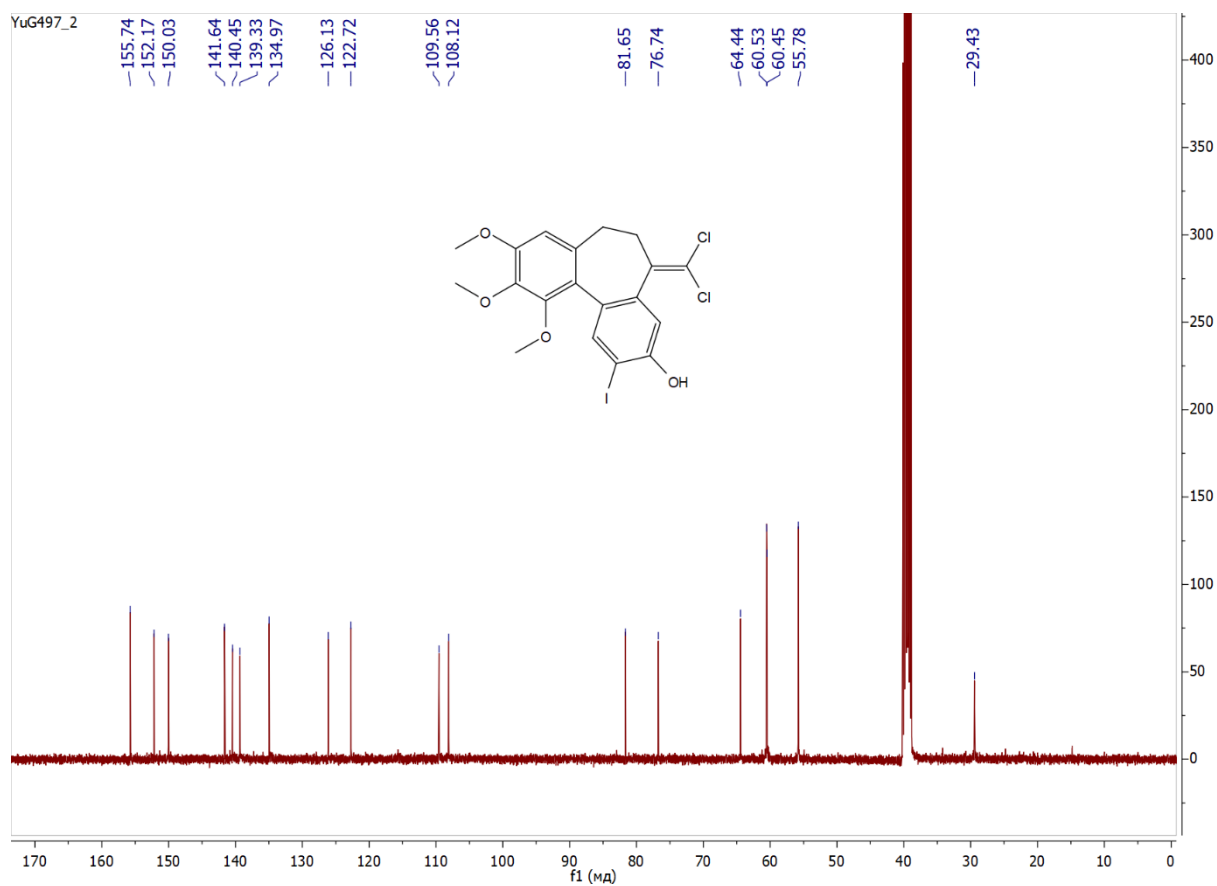

## Compound 8a

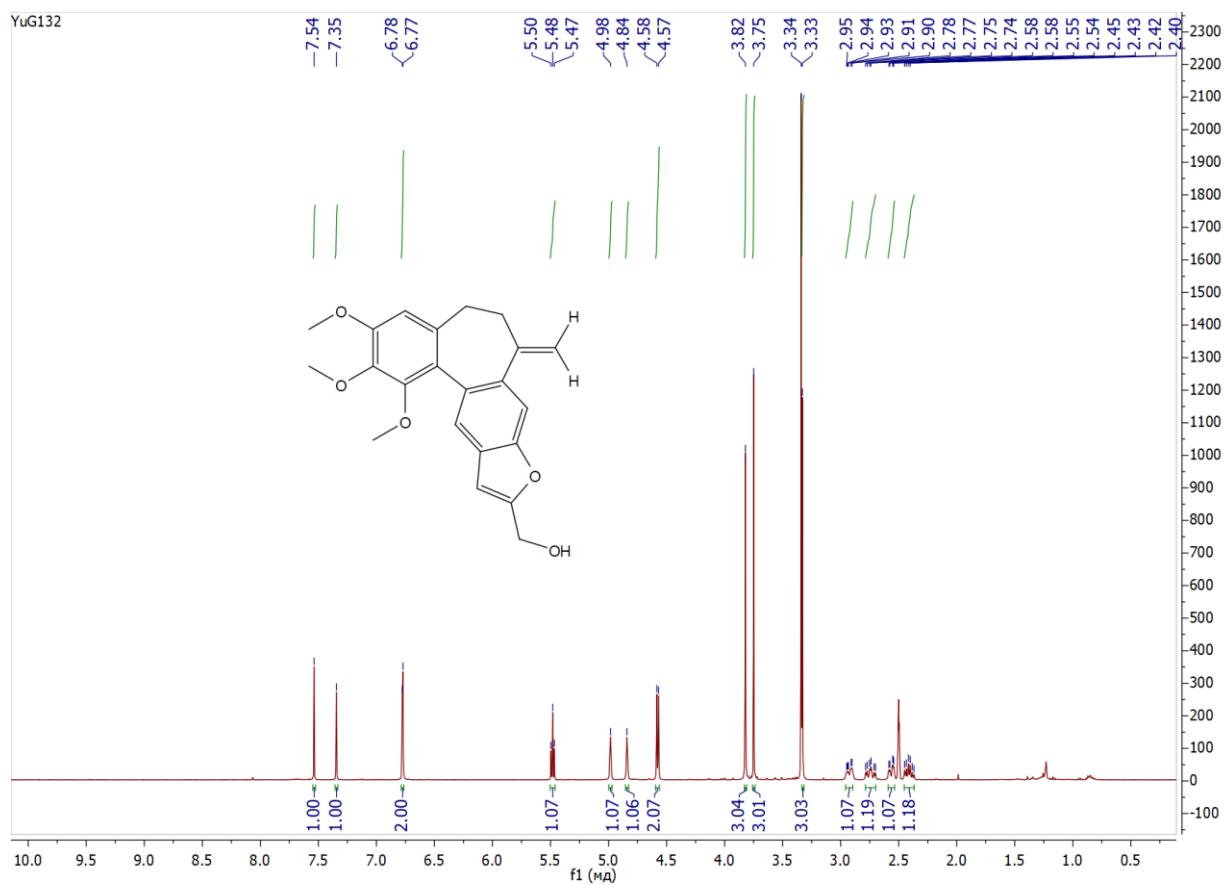

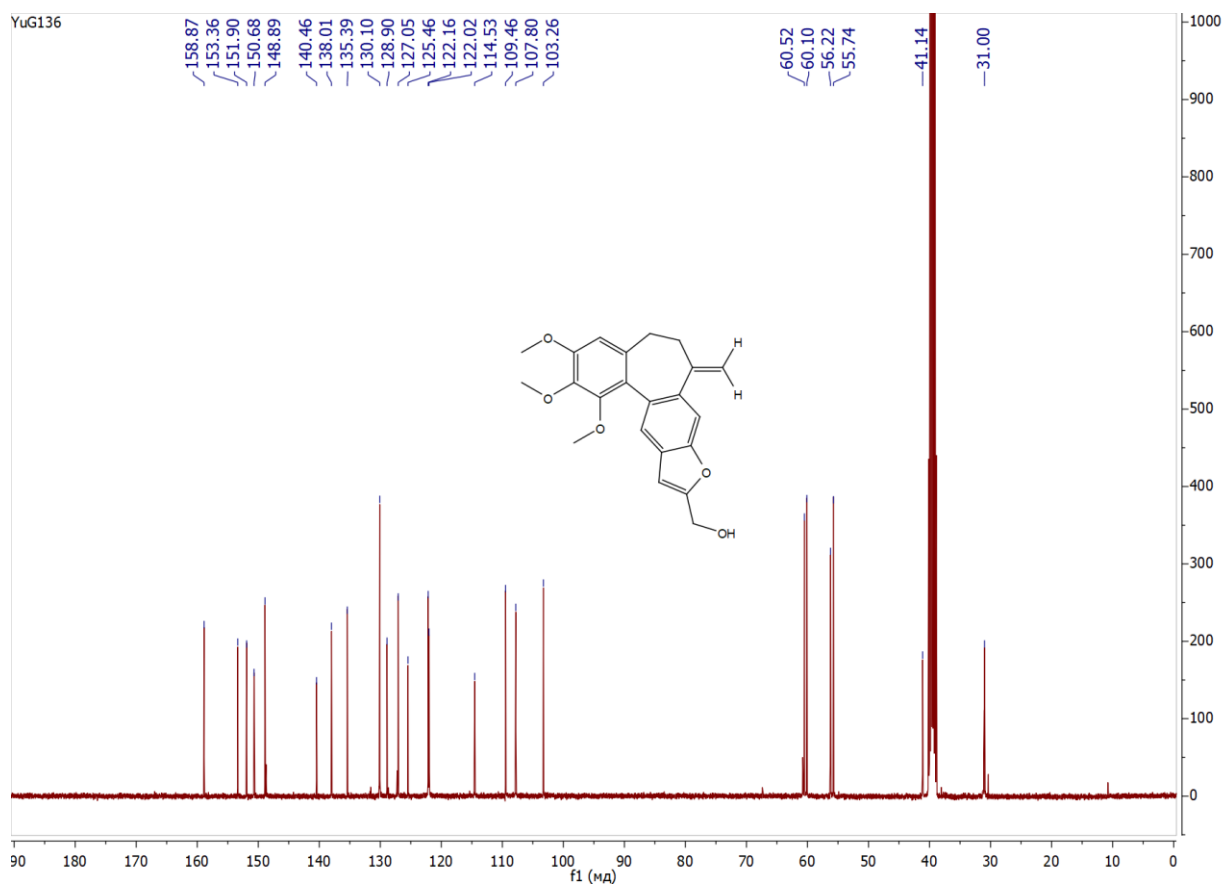

## Compound 8b

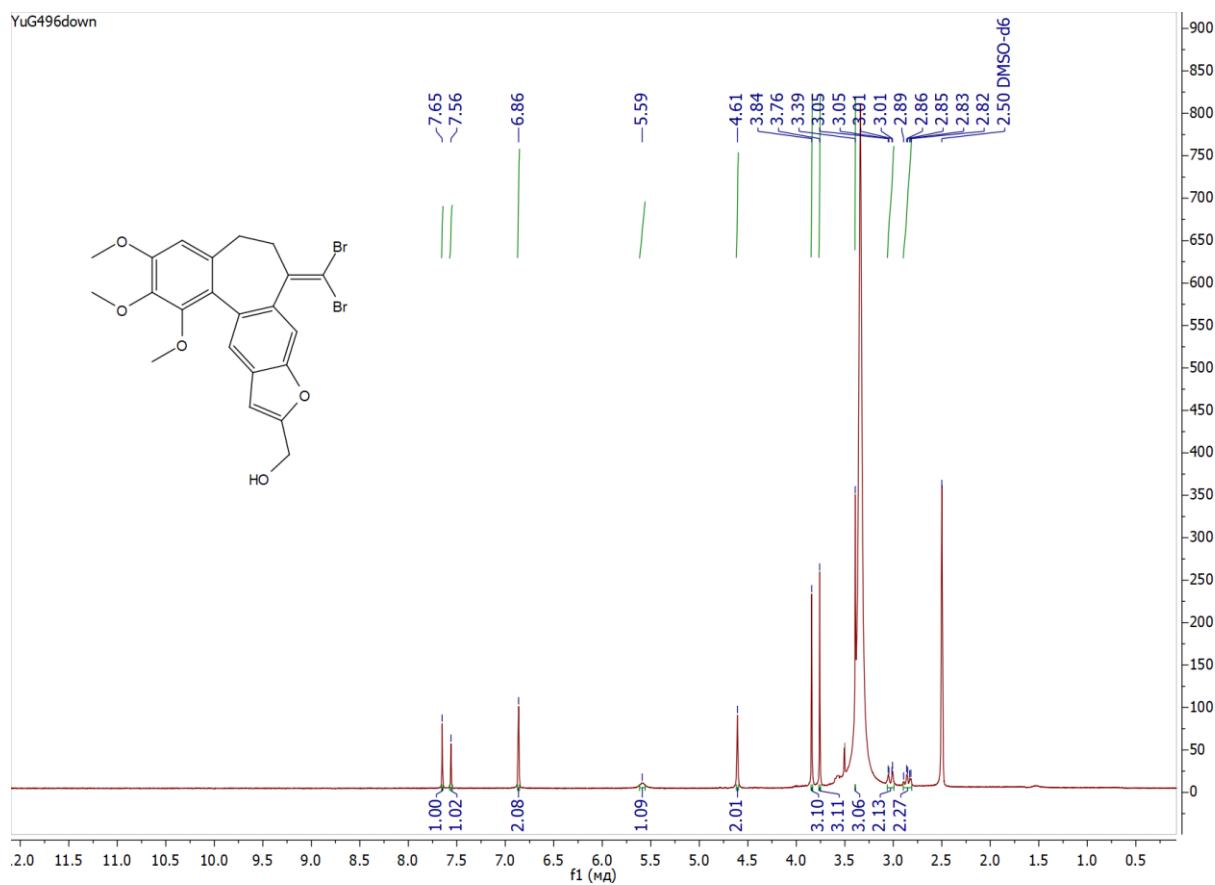

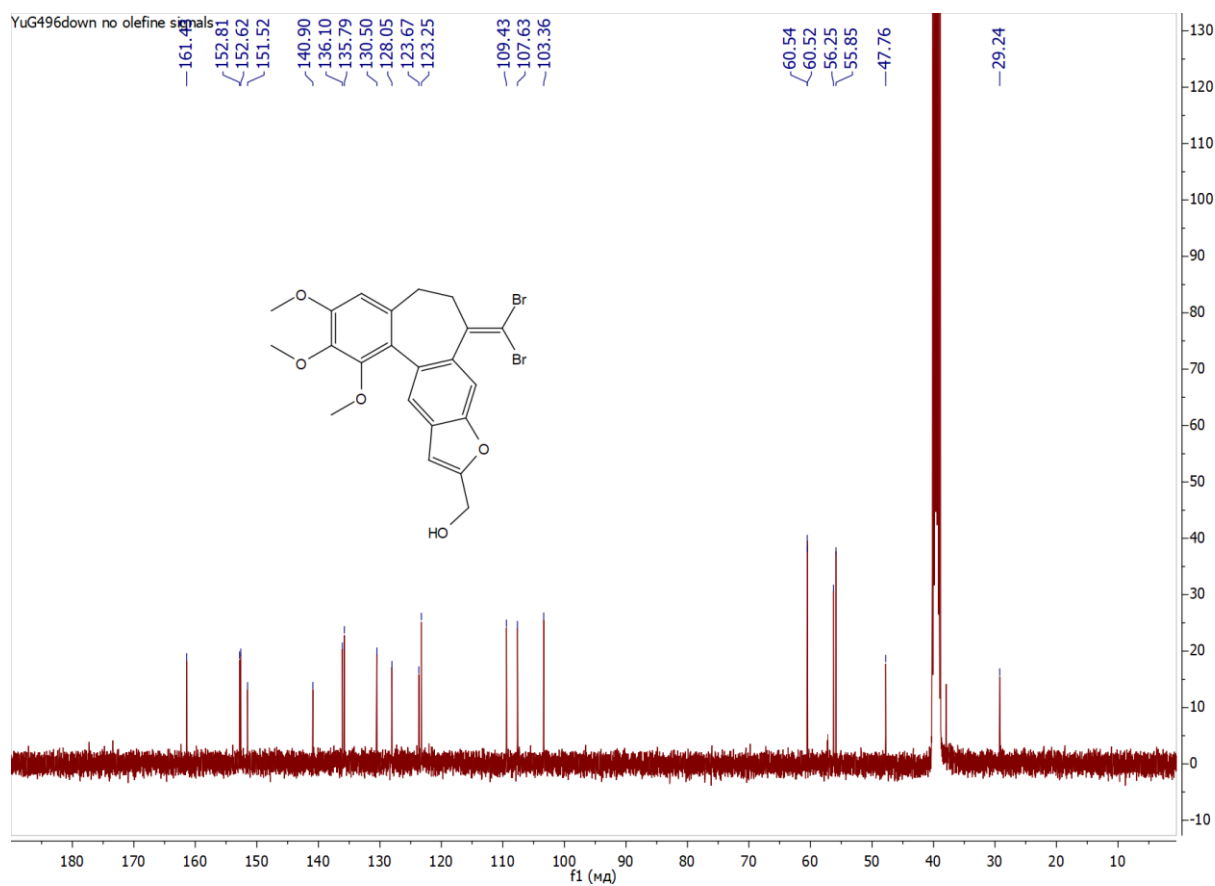

## Compound 8c

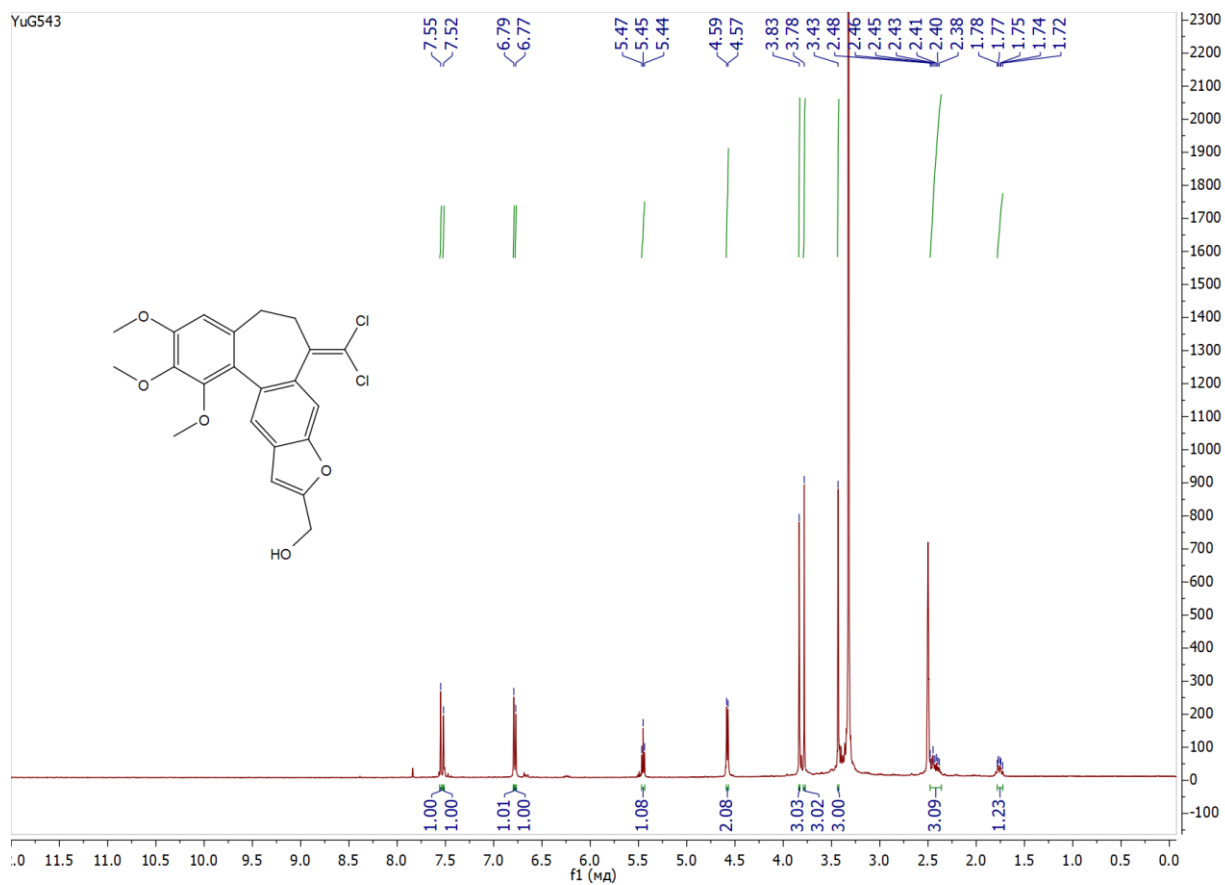

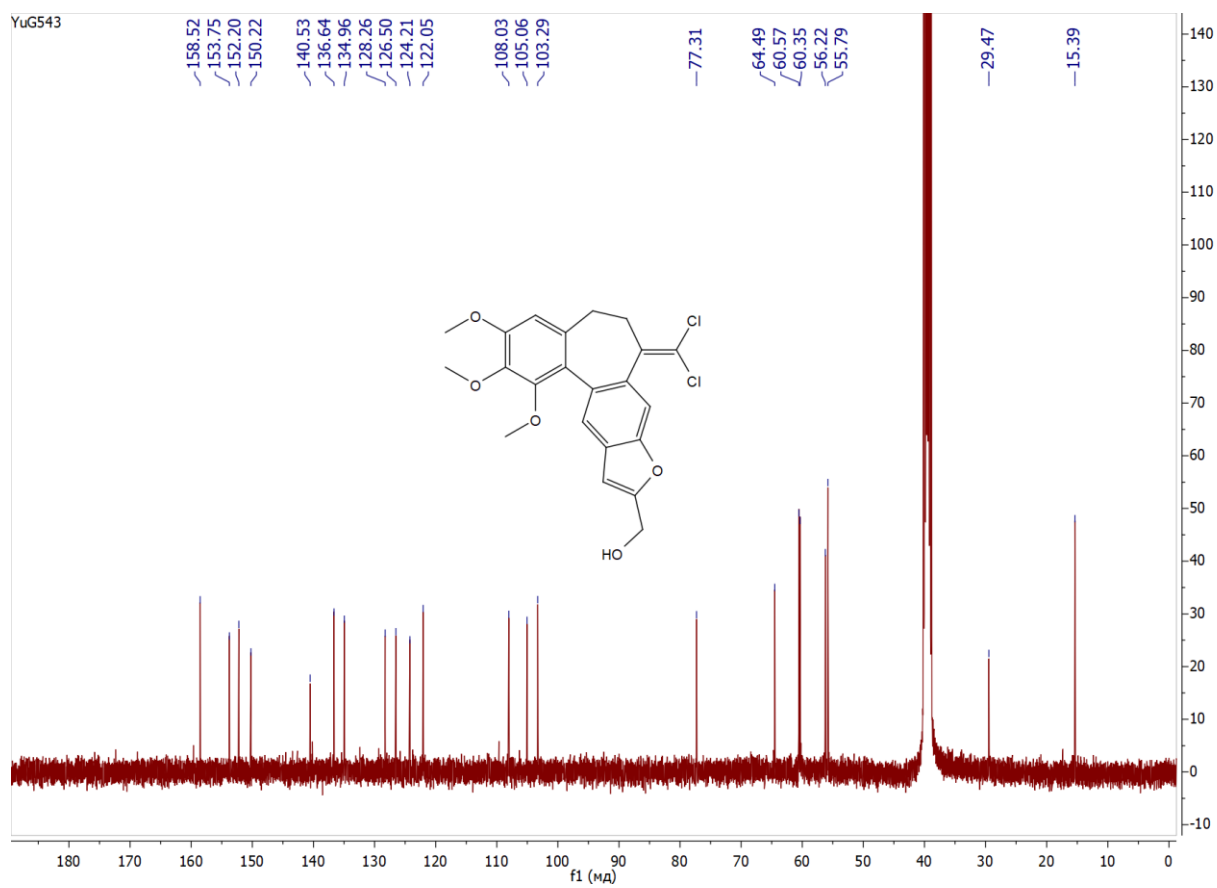

Compound 9Z

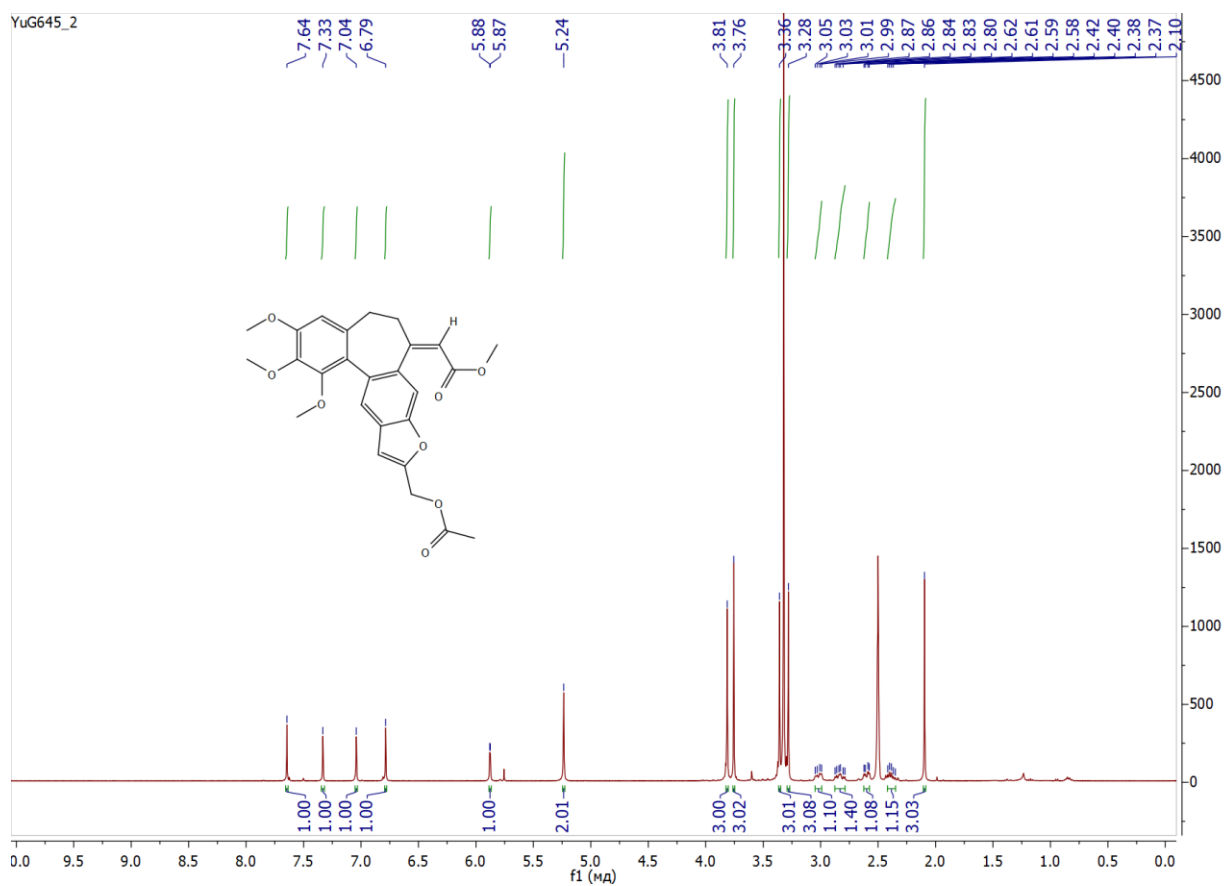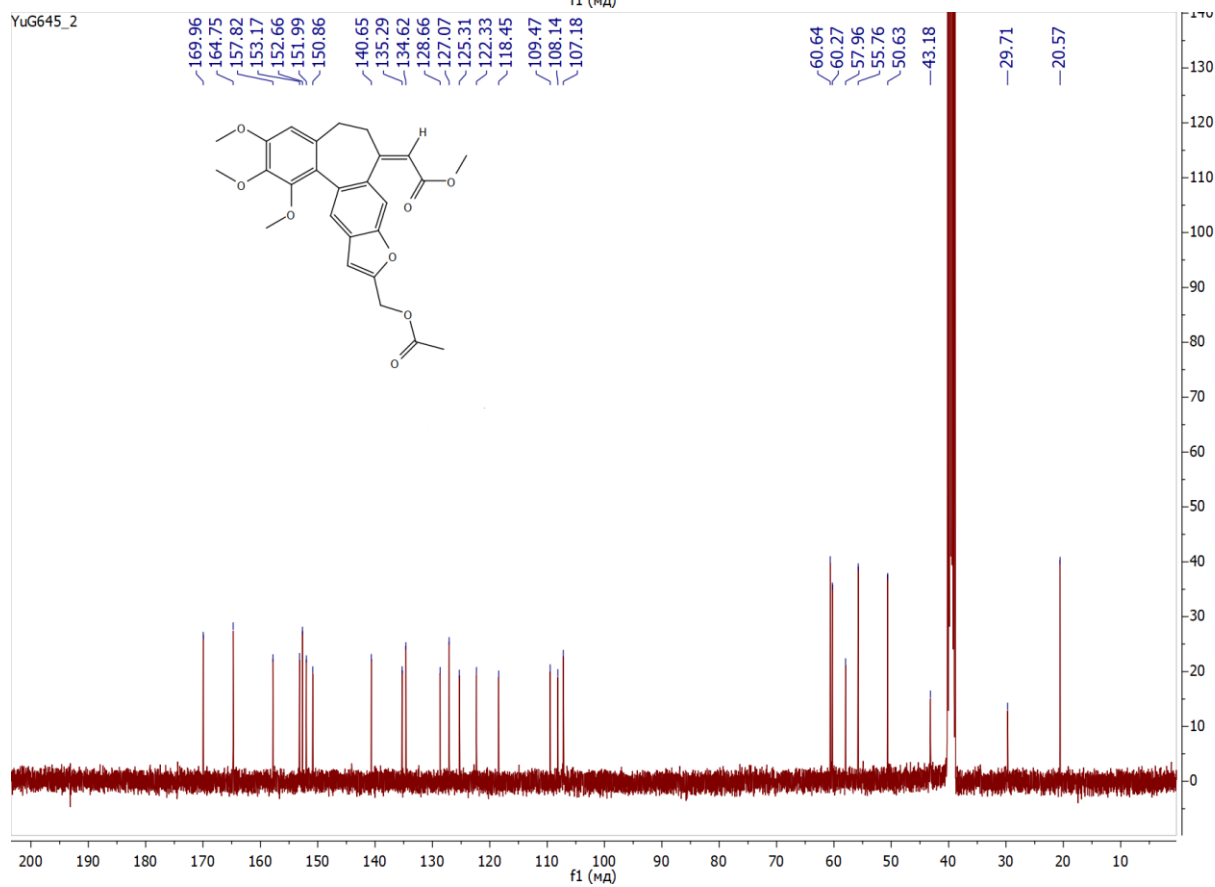

# Compound 9E

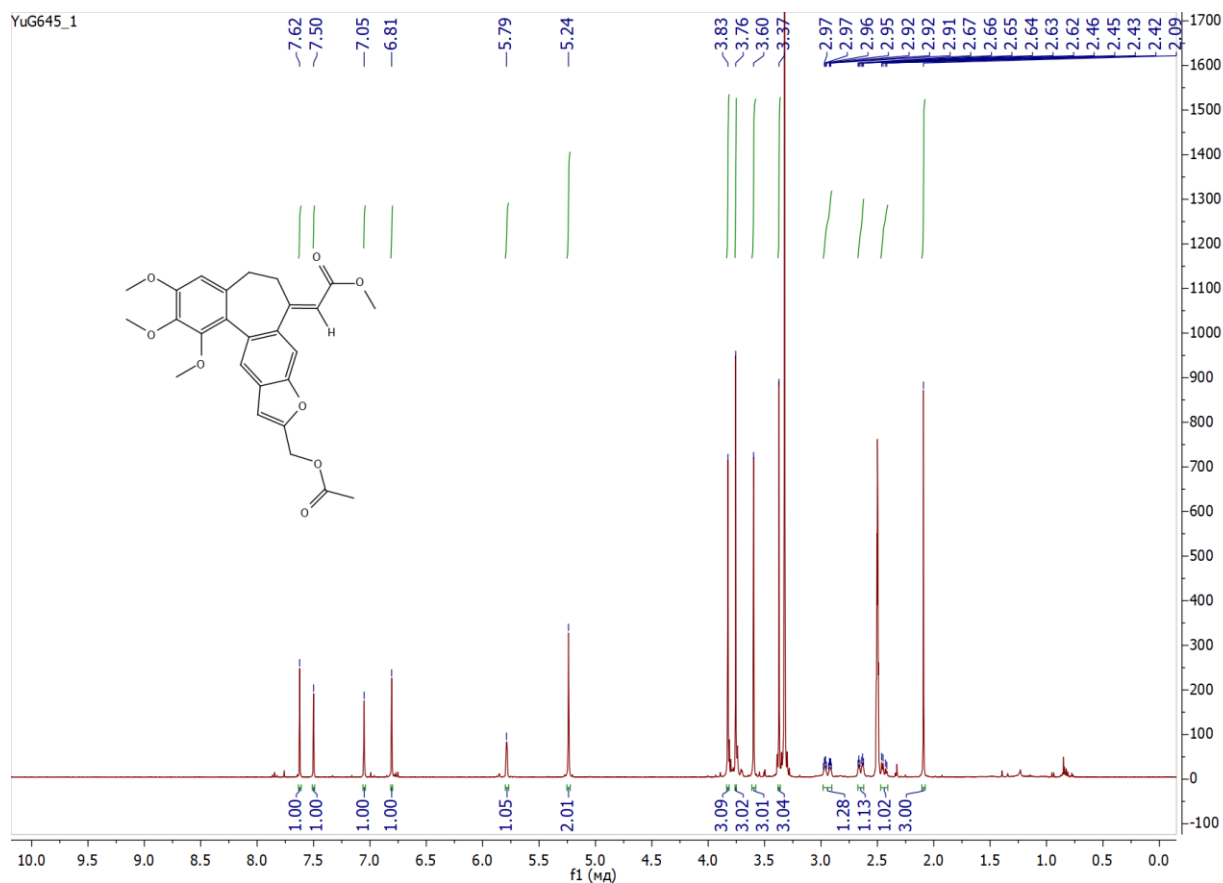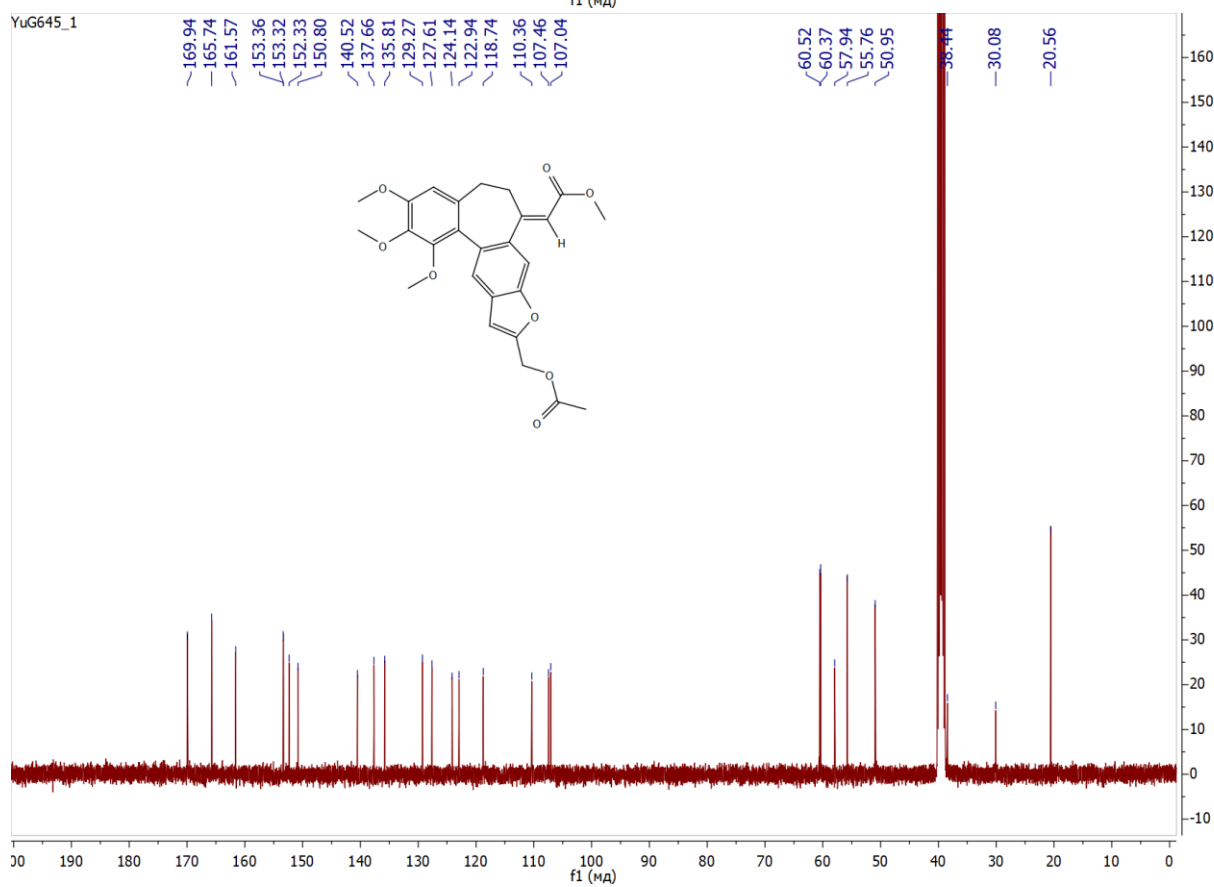

## Explanation of the assignment of *Z*- and *E*-configuration for compounds **9Z** and **9E**

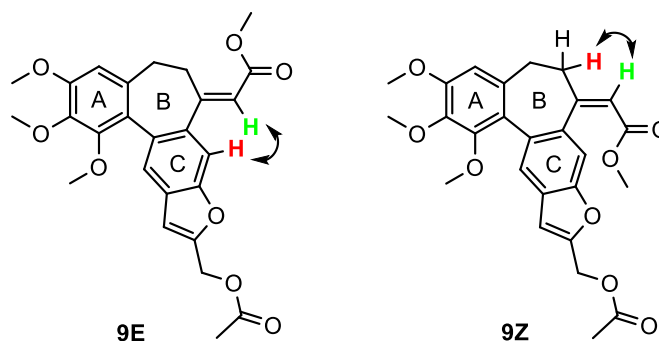

The assignment of *E*/*Z*-configuration of the mentioned isomers (compounds **9E** and **9Z**) were made according to 2D NOESY spectra. The NOESY spectrum of **9E**-isomer showed the through space interaction of olefinic proton (marked in green) with aromatic proton of C-ring (marked in red). In contrast for **9Z**-isomer it was found the interaction of olefinic proton (marked in green) with one of the protons of methylene group of B-ring (marked in red).

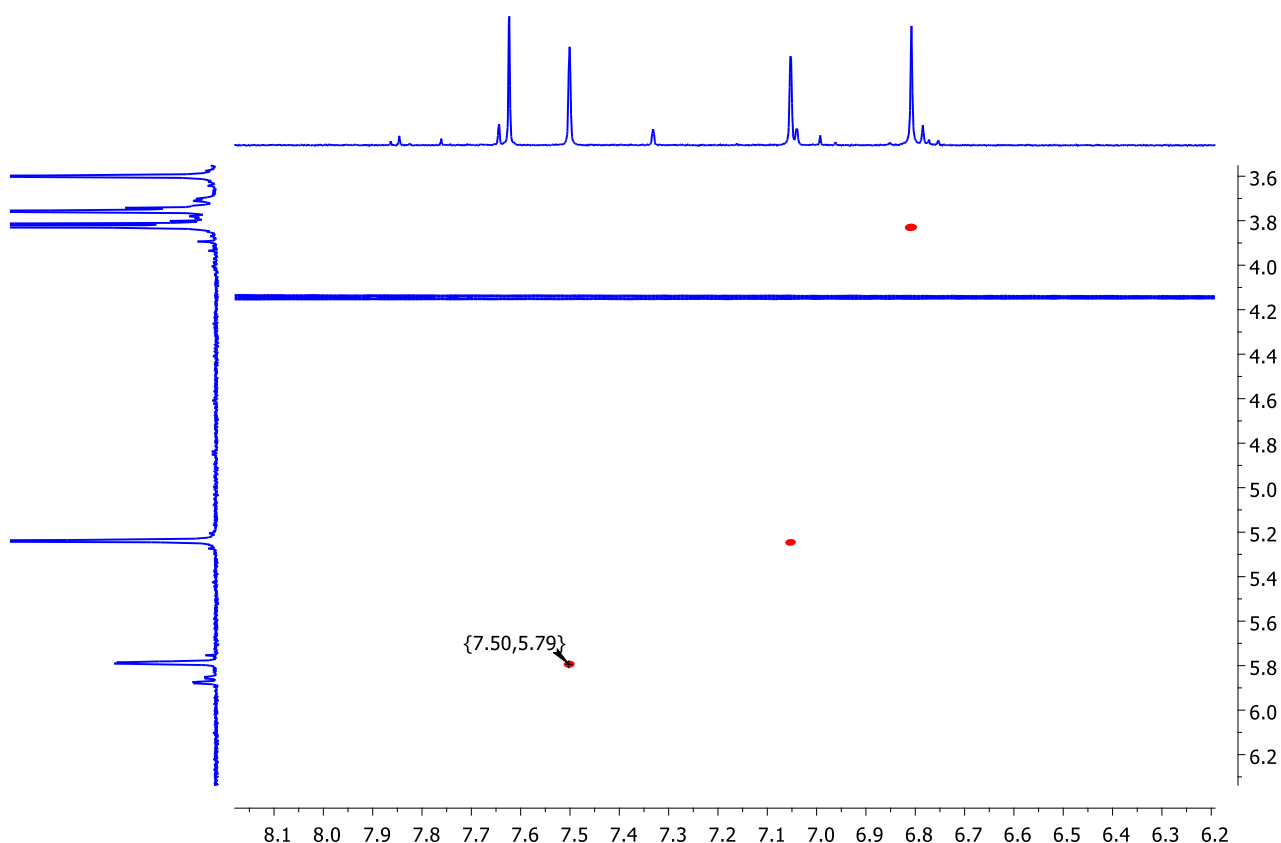

Figure S1. 2D NOESY spectrum of compound **9E**.

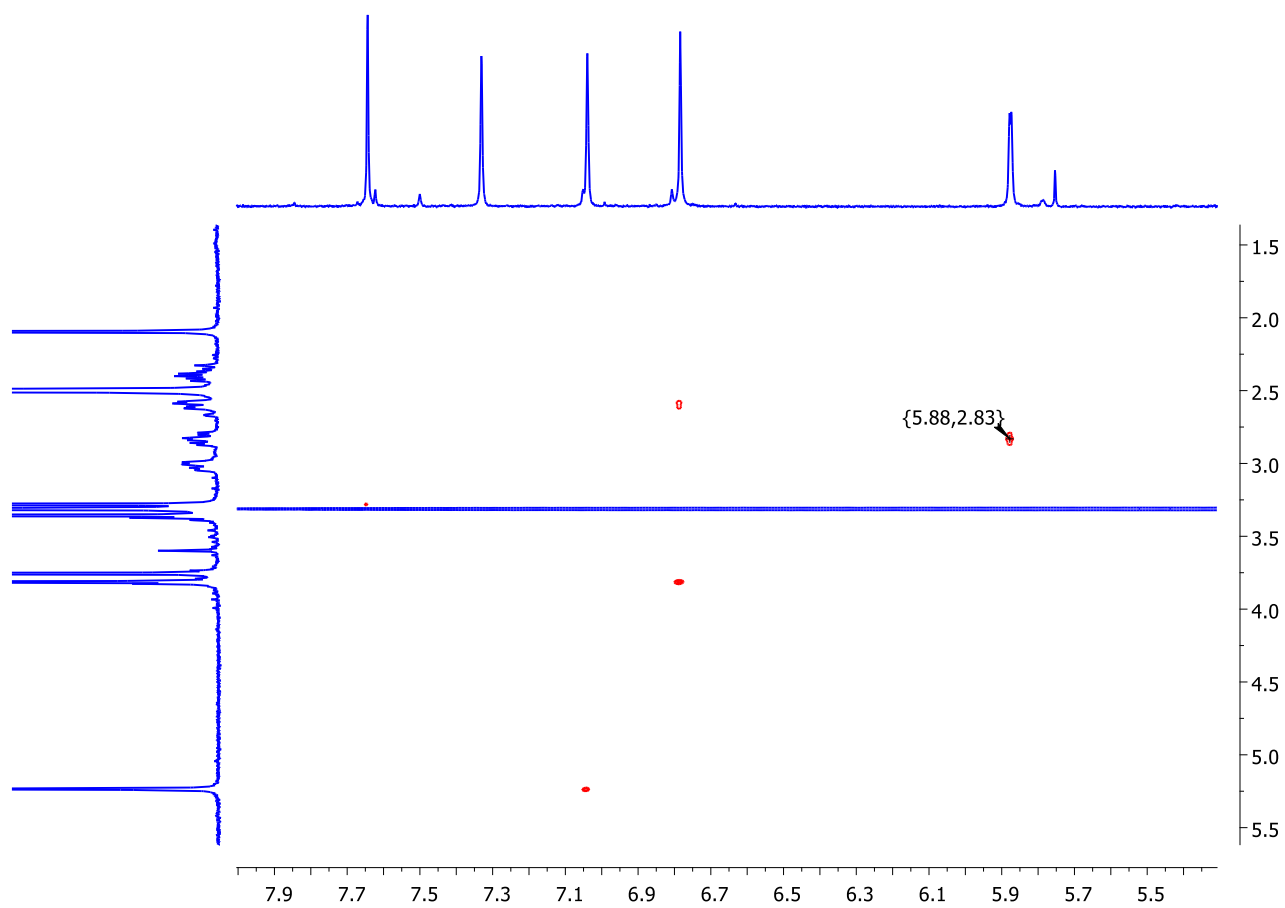

Figure S2. 2D NOESY spectrum of compound **9Z**.
